# Supplementary material for: A controllable transformation in copper valence states and its applications
Source: Royal Society of Chemistry journal article supplement (doi:10.1039/c2dt11666a), 2011-12-23
Supplement: c2dt11666a.pdf [file c2dt11666a.pdf]

# Supporting Information

## A Controllable Transformation in Copper Valence States and Its Applications

Jing Yang<sup>a</sup>, Le Xin Song<sup>\*a,b</sup>, Jun Yang<sup>a</sup>, Zheng Dang<sup>a</sup> and Jie Chen<sup>a</sup>

<sup>a</sup> Department of Chemistry, University of Science and Technology of China, Hefei 230026, P. R. China

<sup>b</sup> State Key Laboratory of Coordination Chemistry, Nanjing University, Nanjing 210093, P. R. China

solexin@ustc.edu.cn

### A list of the contents for all the supporting information

| Pages | Contents                                                                                                                                                                                                                  |
|-------|---------------------------------------------------------------------------------------------------------------------------------------------------------------------------------------------------------------------------|
| S1    | A table of contents page.                                                                                                                                                                                                 |
| S2    | Fig. A. XRD patterns of the sintering products of the mixtures of CuCl <sub>2</sub> ·2H <sub>2</sub> O and α-CD with IMR of 1:0.12 (a), 1:2.3 (b), 1:4.7 (c), 1:14 (d), and 1:21 (e) at 573 K for 2 h in air.             |
| S3    | Fig. B. XRD patterns of the sintering products of the mixtures of CuCl <sub>2</sub> ·2H <sub>2</sub> O and glucose with IMR of 1:0.63 (a), 1:13 (b), 1:25 (c), 1:76 (d), and 1:114 (e) at 573 K for 2 h in air.           |
| S4    | Fig. C. XRD patterns of the sintering products of the mixtures of CuCl <sub>2</sub> ·2H <sub>2</sub> O and starch with initial mass ratio of 1:0.7 (a), 1:2 (b), 1:6 (c), 1:10 (d), and 1:13 (e) at 573 K for 2 h in air. |

## XRD patterns of the sintering products of the mixtures of $\text{CuCl}_2 \cdot 2\text{H}_2\text{O}$ and $\alpha\text{-CD}$

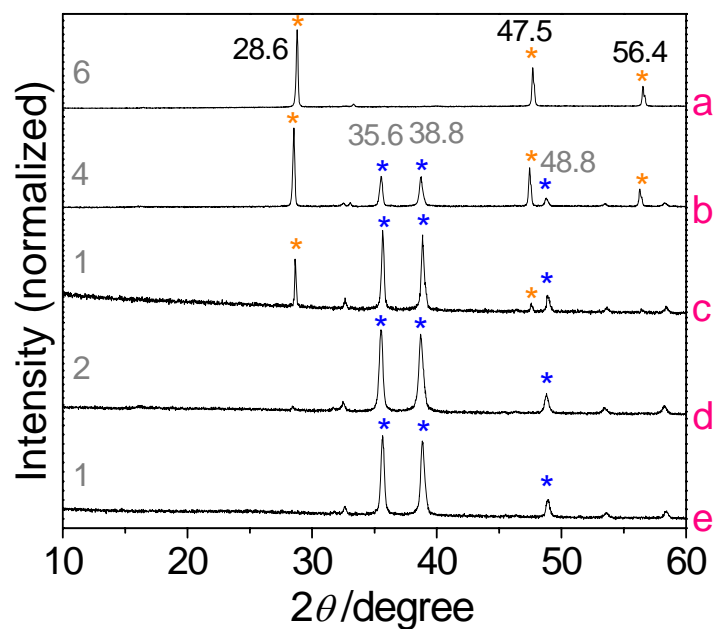

**Fig. A** XRD patterns of the sintering products of the mixtures of  $\text{CuCl}_2 \cdot 2\text{H}_2\text{O}$  and  $\alpha\text{-CD}$  with mole ratios (MR) of 1:0.12 (a), 1:2.3 (b), 1:4.7 (c), 1:14 (d), and 1:21 (e) at 573 K for 2 h in air. Relative signal intensity was normalized to the intensity of the peak at  $35.6^\circ$  in curve c.

## XRD patterns of the sintering products of the mixtures of $\text{CuCl}_2 \cdot 2\text{H}_2\text{O}$ and glucose

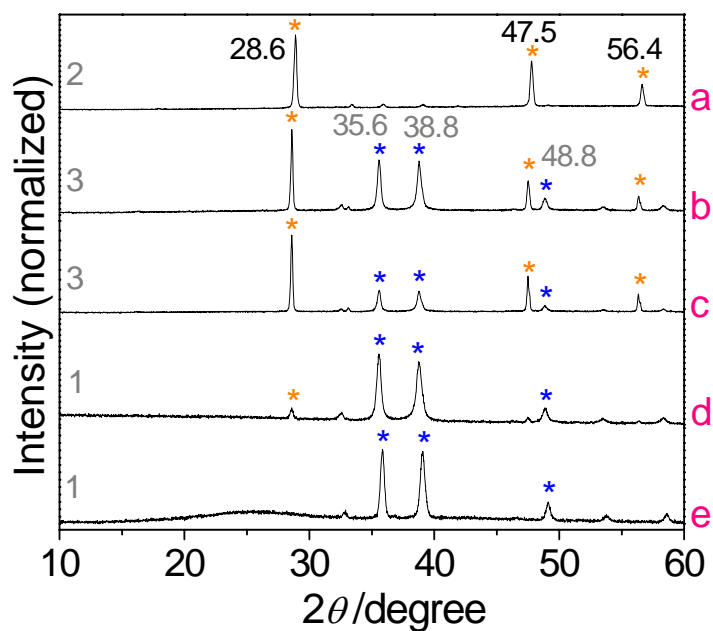

**Fig. B** XRD patterns of the sintering products of the mixtures of  $\text{CuCl}_2 \cdot 2\text{H}_2\text{O}$  and glucose with mole ratios (MR) of 1:0.63 (a), 1:13 (b), 1:25 (c), 1:76 (d), and 1:114 (e) at 573 K for 2 h in air. Relative signal intensity was normalized to the intensity of the peak at  $35.6^\circ$  in curve e.

## XRD patterns of the sintering products of the mixtures of $\text{CuCl}_2 \cdot 2\text{H}_2\text{O}$ and starch

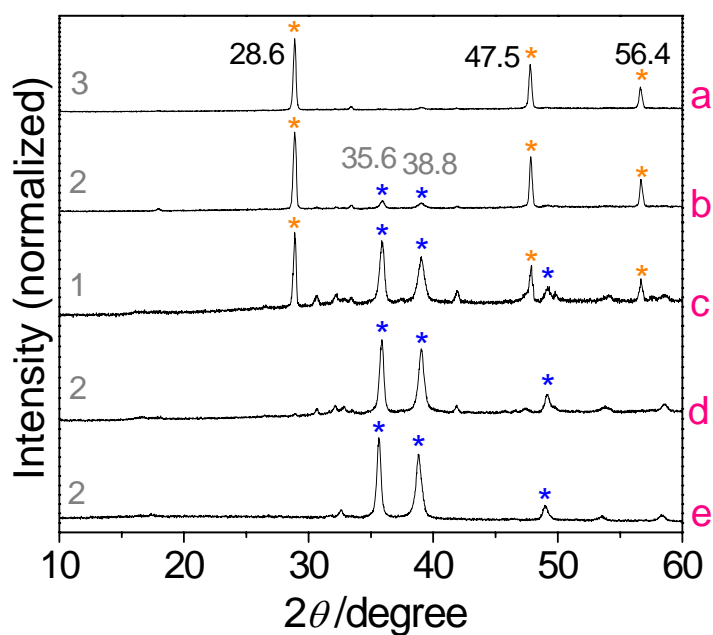

**Fig. C** XRD patterns of the sintering products of the mixtures of  $\text{CuCl}_2 \cdot 2\text{H}_2\text{O}$  and starch with initial mass ratio of 1:0.7 (a), 1:2 (b), 1:6 (c), 1:10 (d), and 1:13 (e) at 573 K for 2 h in air. Relative signal intensity was normalized to the intensity of the peak at  $35.6^\circ$  in curve c.
